# Supplementary material
Source: PubMed Central journal article supplement (PMC2042187)
Supplement: pnas_0703904104_2.pdf [file pnas_0703904104_2.pdf]

-----

ALIGNMENT BETWEEN:

AGAP012706  
AGAP009370  
AGAP009369

best alignment n: 1

names: AGAP012706 - AGAP009370  
(alleles of the same gene)

identities: 97/98 (98%), positives: 98/98 (100%)

score: 2.465000e+002

MKTVIVLFALVAVATAMQPFYHPQEQFPVMEIMPINTLDNRQLPKILESLVGLVDFLNVFEATRGGDPVDRNMRQLLQLLPPFAKTLNEQFGQ  
|||||  
MKTIVLFAVAVATAMQPFYHPQEQFPVMEIMPINTLDNRQLPKILESLVGLVDFLNVFEATRGGDPVDRNMRQLLQLLPPFAKTLNEQFGQ

-----

best alignment n: 2

names: AGAP012706- AGAP009369

identities: 87/100 (87%), positives: 91/100 (91%)

score: 2.085000e+002

MKTVIVLFALVAVATAMQPFYHPQEQFPVMEIMPINTLDNRQLPKILESLVGLVDFLNVFEATRGGDPVDRNMRQLLQLLPPFAKTLNEQFGQ--  
|||||  
MKTIVLFAVAVATAMQPFYHPQEQFPVMEIMPINTLDNRQLPKILESLVGLVDFLNVFEATRGGDPVDRNMRQLSFLLLTLLPSIVDTVYRIFGQPT

-----

MSOPA

scoring matrix:  
blosum62

-----

best alignment n: 1

names: CG14560 (MsOPA) - AGAP009353

identities: 18/86 (20%), positives: 46/86 (53%)

score: 9.500000e+000

M-NFIQI AVLFLVVALARPEQEDPANLPAPEAA--AAPPAATAAPAAAAAAPPAPPAAPAAAPQAAAPAGGSRKKNVHNHTIG  
| | : : : | | : : : | | : : : | : : : | : : : | : : : | : : : | : : : | : : : | : : : | : : : | : : : | : : : | : : : | : : :  
MSNIVKLALLTLIALIGLAVGQLSEGSVPKPTFPDYVIYVEACETYGAGKCGHPTSDVPTPEMPQSSQQ-----IETNVQ-SVLQNF

-----

best alignment n: 2

names: CG14560 (MsOPA) - AGAP012680





scoring matrix:  
blosum62  
-----

best alignment n: 1  
names: Mst57Da - AGAP009359

identities: 21/83 (25%), positives: 37/83 (44%)  
score: 9.50000e+000  
MKFLALFVTLVLLVLAALVSAQKSQNTNHNHVIVIGAKKPGAAPAAAAAAPPAAAAAAPPAAPEAGLADAPAES-----  
|||| :: ||: ::|| | : ::|| | : | : : : ||: | : ||: | : ||: | : ||: | :  
MKFLATII-LFAFIALI-GQSAEP SRNDISVYEKLCQTFGLEKDCWTTANPPP TKRP-----LADIKQETKENKNLMR

best alignment n: 2  
names: Mst57Da - AGAP009354

identities: 21/83 (25%), positives: 37/83 (44%)  
score: 9.50000e+000  
MKFLALFVTLVLLVLAALVSAQKSQNTNHNHVIVIGAKKPGAAPAAAAAAPPAAAAAAPPAAPEAGLADAPAES-----  
|||| :: ||: ::|| | : ::|| | : | : : : ||: | : ||: | : ||: | : ||: | :  
MKFLATII-LFAFIALI-GQSAEP SRNDISVYEKLCQTFGLEKDCWTTANPPP TKRP-----LADIKQETKENKNLMR

best alignment n: 3  
names: Mst57Da - AGAP009357

identities: 19/78 (24%), positives: 33/78 (42%)  
score: 9  
MKFL--ALFVTLVLLVLAALVSAQKSQNTNHNHVIVIGAKKPGAAPAAAAAAPPAAAAAAPPAAPEAGL-ADAPAES  
||| : :: ||: ::|| | : ::|| | : | : : : ||: | : ||: | : ||: | : ||: | :  
MKFFVQVFLFALLALLGLVSAQK-----AINPATTTARP IFFPCFDEDEDGIFIGCTPHP

REVERSE SEARCH

scoring matrix:  
blosum62  
-----

best alignment n: 1  
names: AGAP009354 - CG13159-PA type=protein; loc=2R:7891276..7891503; name=CG13159-PA;  
dbxref=FlyBase:FBpp0087023,GB\_protein:AAF58525.1,FlyBase\_Annotation\_IDs:CG13159-  
PA,FlyBase:FBgn0033721; MD5=d9cf6cc78390454d1e68f859559f416e; parent=FBtr0087912; release=r4.3;  
species=Dmel; length=76;  
identities: 18/83 (21%), positives: 39/83 (46%)  
score: 1.15000e+001  
MKFLATIIILFAFIALIGQGS-----AEP SRNDISVYEKLCQ-----TFGLEKDCWTTANPPP TKRPLADIKQETKENKNLMR









best alignment n: 1  
names: AGAP009359 - AGAP009354  
identities: 70/71 (98%), positives: 71/71 (100%)  
score: 1.825000e+002

MKFLATIIILFALIGQGSAAEPSRNDISVYEKLCQTFGLEKDCWTTANPPTKRPLADIKQETKENKKNLMR  
|||||  
MKFLATIIILFALIGQGSAAEPSRNDISVYEKLCQTFGLEKDCWTTANPPTKRPLADIKQETKENKKNLMR

-----

best alignment n: 2  
names: AGAP009359 - AGAP009356  
identities: 68/71 (95%), positives: 70/71 (98%)  
score: 180

MKFLATIIILFALIGQGSAAEPSRNDISVYEKLCQTFGLEKDCWTTANPPTKRPLADIKQETKENKKNLMR  
|||||  
MKFLATIIILFALIGQGSAAEPSRNDISVYEKLCQTFGLEKDCWTTANPPTKRPLADIKQETKENKKNLMR

-----

ANP -PA

scoring matrix:  
blosum62

-----

best alignment n: 1  
names: Anp - AGAP009429

identities: 20/76 (26%), positives: 32/76 (42%)  
score: 1.750000e+001  
MKYFVVLVLALILAI SVGPSDA-----VFIDILDKVENAIHNAAQVIGFAKPFKFLINPK  
||: :||| | : : || : || : : : | : | : | : ||  
MKFAIVLVVAVAFAILAFATTPSAANESKCLKSATHLMDHLVKAPIVSDLLKSLADHIDHKAAEGAA-AKETTTTPAPPA

-----

-----

REVERSE SEARCH

best alignment n: 1  
names: AGAP009429 - Anp-PA type=protein; loc=3R:26035707..26035939; name=Anp-PA;  
dbxref=FlyBase:FBpp0084976,GB\_protein:AAF57024.1,FlyBase\_Annotation\_IDS:CG1361-  
PA,FlyBase:FBgn0000094; MD5=da1477d3322884499848ae1280af5c25; parent=FBtr0085611; release=r4.3;  
species=Dmel; length=57;  
identities: 20/76 (26%), positives: 32/76 (42%)  
score: 1.750000e+001  
MKFAIVLVVAVAFAILAFATTPSAANESKCLKSATHLMDHLVKAPIVSDLLKSLADHIDHKAAEGAA-AKETTTTPAPPA  
||: :||| | : : || : || : : : | : | : | : ||  
MKYFVVLVLALILAI SVGPSDA-----VFIDILDKVENAIHNAAQVIGFAKPFKFLINPK

- 
- 
1. Smith, T. F. & Waterman, M. S. (1981) *J Mol Biol* **147**, 195-7.
  2. Needleman, S. B. & Wunsch, C. D. (1970) *J Mol Biol* **48**, 443-53.
